# Supplementary figures and images for: A Discrete Class of Intergenic DNA Dictates Meiotic DNA Break Hotspots in Fission Yeast
Source: PLOS journal article supplement (doi:10.1371/journal.pgen.0030141), 2007-08-20

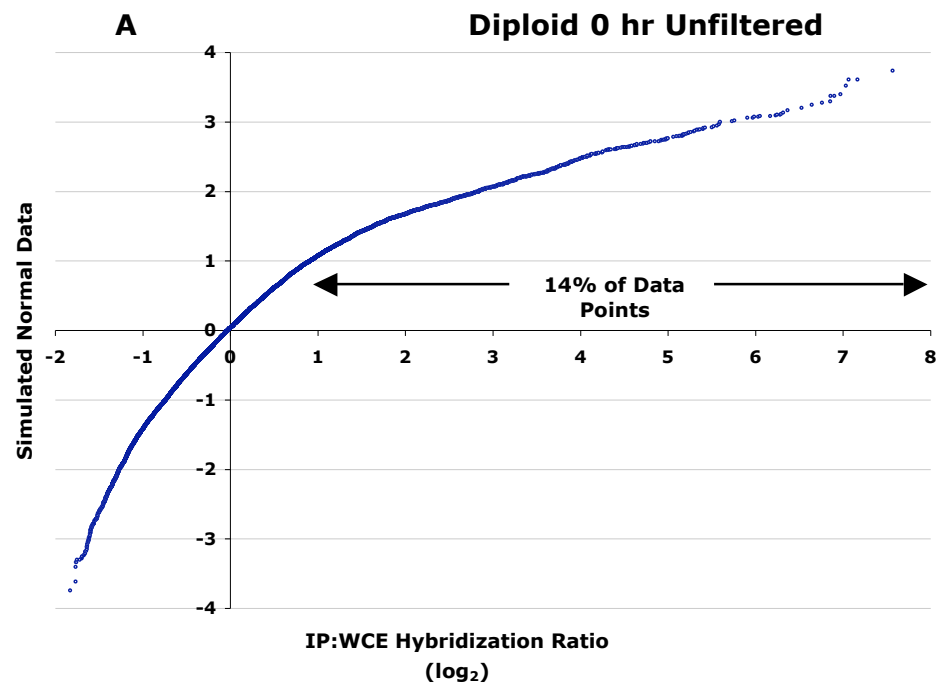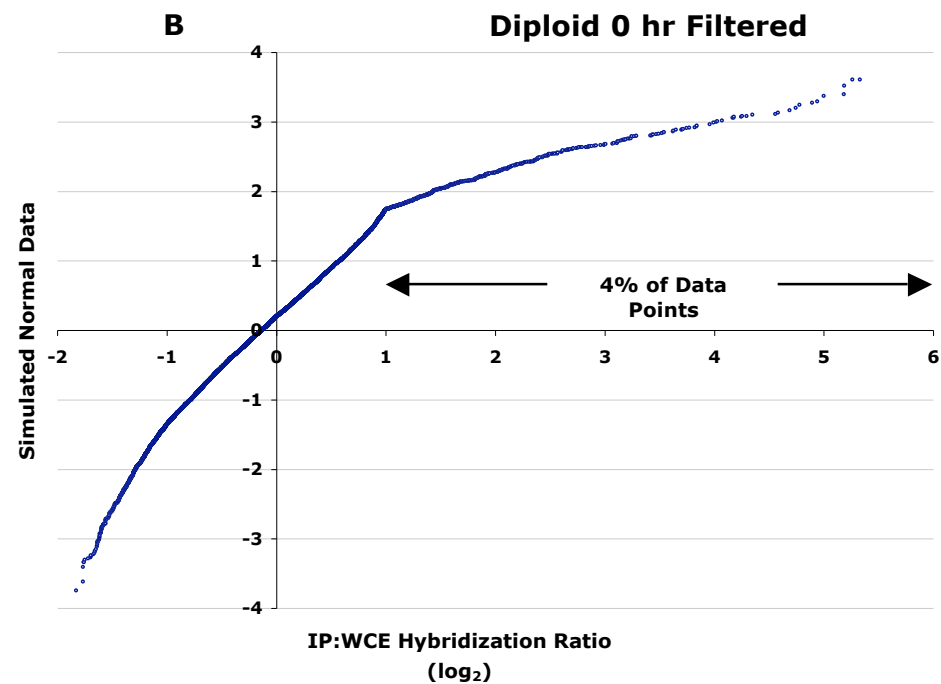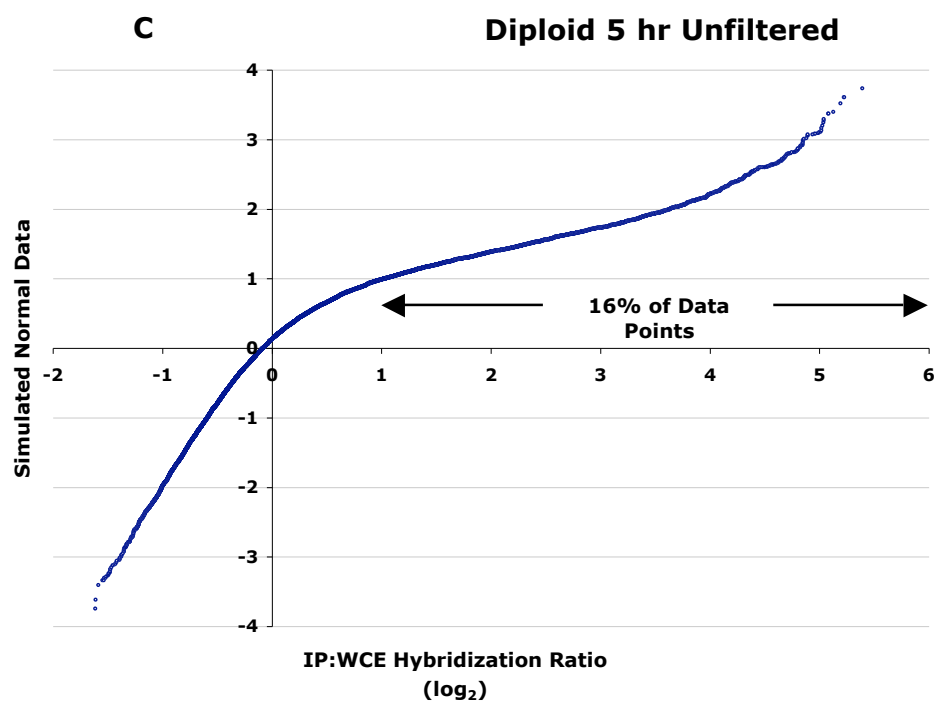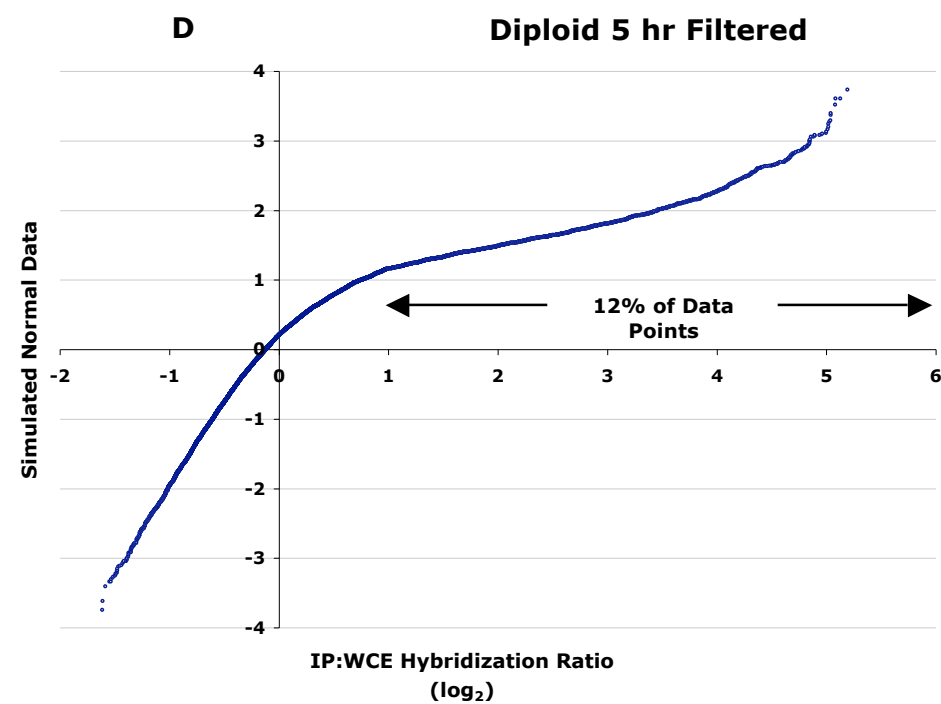

Supplement: S4 (10.1371/journal.pgen.0030141.s004) [file journal.pgen.0030141.s004]
